# Supplementary material for: Implementation of SARS-CoV-2 monoclonal antibody infusion sites at three medical centers in the United States: Strengths and challenges assessment to inform COVID-19 pandemic and future public health emergency use
Source: bioRxiv or medRxiv preprint supplement (doi:10.1101/2021.04.05.21254707), 2021-04-06
Supplement: Supplementary file [file media-1.pdf]

1 **TITLE**

2 Implementation of SARS-CoV-2 monoclonal antibody infusion sites at three medical centers in the  
3 United States: Strengths and challenges assessment to inform COVID-19 pandemic and future public  
4 health emergency use

5

6 **AUTHORS**

7 Anastasia S. Lambrou<sup>1,2</sup>, John T. Redd<sup>1</sup>, Miles A. Stewart<sup>1,2</sup>, Kaitlin Rainwater-Lovett<sup>1,2</sup>, Jonathan K.  
8 Thornhill<sup>1,2</sup>, Lynn Hayes<sup>1</sup>, Gina Smith<sup>1</sup>, George Thorp<sup>1</sup>, Christian Tomaszewski<sup>3,4</sup>, Adolphe Edward<sup>3,4</sup>,  
9 Natalia Elías Calles<sup>5</sup>, Mark Amox<sup>6</sup>, Steven Merta<sup>6</sup>, Tiffany Pfundt<sup>1</sup>, Victoria Callahan<sup>1</sup>, Adam Tewell<sup>1</sup>,  
10 Helga Scharf-Bell<sup>1</sup>, Samuel Imbriale<sup>1</sup>, Jeffrey D. Freeman<sup>1,2</sup>, Michael Anderson<sup>1</sup>, Robert P. Kadlec<sup>1</sup>

11

12 **AFFILIATIONS**

13 <sup>1</sup>Office of the Assistant Secretary for Preparedness and Response, U. S. Department of Health and  
14 Human Services, Washington, DC, U.S.

15 <sup>2</sup>Johns Hopkins University Applied Physics Laboratory, Laurel, Maryland, U.S.

16 <sup>3</sup>El Centro Regional Medical Center, El Centro, CA, U.S.

17 <sup>4</sup>UC San Diego Health, San Diego, CA, U.S.

18 <sup>5</sup>TMC HealthCare, Tucson, AZ, U.S.

19 <sup>6</sup>Sunrise Hospital and Medical Center, Las Vegas, NV, U.S.

20

21 **CORRESPONDING AUTHOR**

22 Anastasia S. Lambrou, PhD

23 Anastasia.Lambrou@hhs.gov

24

25 **SUPPLEMENTARY INFORMATION**

26 **SI Table 1.** Monoclonal antibody US Food and Drug Administration (FDA) Emergency Use Agreement EUA

27 prospective patient criteria as of February 2021.

| Prospective Patient Age                                                               | Risk Factors                                                                                                                                                                                                                                                                                                                                                                                                                                                                                                                                                |
|---------------------------------------------------------------------------------------|-------------------------------------------------------------------------------------------------------------------------------------------------------------------------------------------------------------------------------------------------------------------------------------------------------------------------------------------------------------------------------------------------------------------------------------------------------------------------------------------------------------------------------------------------------------|
| <p><b>≥18 years of age</b><br/>and at least one of the following risk factors</p>     | <ul style="list-style-type: none"> <li>• Have a body mass index (BMI) ≥35</li> <li>• Have chronic kidney disease</li> <li>• Have diabetes</li> <li>• Have immunosuppressive disease Are currently receiving immunosuppressive treatment</li> <li>• Are ≥65 years of age</li> </ul>                                                                                                                                                                                                                                                                          |
| <p><b>≥55 years of age</b><br/>and at least one of the following risk factors</p>     | <ul style="list-style-type: none"> <li>• Cardiovascular disease</li> <li>• Hypertension</li> <li>• Chronic obstructive pulmonary disease/other chronic respiratory disease</li> </ul>                                                                                                                                                                                                                                                                                                                                                                       |
| <p><b>12 – 17 years of age</b><br/>and at least one of the following risk factors</p> | <ul style="list-style-type: none"> <li>• BMI ≥85th percentile for their age and gender based on CDC growth charts</li> <li>• Sickle cell disease</li> <li>• Congenital or acquired heart disease</li> <li>• Neurodevelopmental disorders, for example, cerebral palsy</li> <li>• Medical-related technological dependence, for example, tracheostomy, gastrostomy, or positive pressure ventilation (not related to COVID-19)</li> <li>• Asthma, reactive airway or other chronic respiratory disease that requires daily medication for control</li> </ul> |

28

29

30

31

32

33

34

35

36

37

38 **SI Table 2.** Monoclonal antibody infusion site process assessment metric descriptions and corresponding semi-  
 39 structured interview questions.

| Metric                                                | Definition                                                                                                                                            | Data                                                                                            |
|-------------------------------------------------------|-------------------------------------------------------------------------------------------------------------------------------------------------------|-------------------------------------------------------------------------------------------------|
| <b>Engagement &amp; Workflow Logistics</b>            | Components, steps, and official procedures of engaging with all stakeholders and the workflow of the infusion process to assess areas of improvement. | List the steps of the infusion process from recruitment to scheduling and receiving the therapy |
|                                                       |                                                                                                                                                       | How long does each step take from the perspective of patients and staff?                        |
|                                                       |                                                                                                                                                       | What are the current patient/community engagement/outreach mechanisms?                          |
|                                                       |                                                                                                                                                       | What are the current provider/clinical engagement/outreach mechanisms?                          |
|                                                       |                                                                                                                                                       | What forms of transportation do patients use to travel to and from their appointment?           |
|                                                       |                                                                                                                                                       | What barriers do patient face when scheduling or attending the appointment?                     |
|                                                       |                                                                                                                                                       | How can the site increase provider/prescriber buy-in?                                           |
|                                                       |                                                                                                                                                       | What are the hard vs. soft constrains of the process?                                           |
| <b>Timing</b>                                         | Metrics related to timing of steps and engagement and therapy-quality related metrics such as preparation and temperature.                            | Time from registration/scheduling to appointment (mean, individual data if available)           |
|                                                       |                                                                                                                                                       | Time from symptom onset to infusion                                                             |
|                                                       |                                                                                                                                                       | Time from positive test to infusion                                                             |
|                                                       |                                                                                                                                                       | Total appointment time                                                                          |
|                                                       |                                                                                                                                                       | Estimated time for each infusion process step                                                   |
|                                                       |                                                                                                                                                       | Transition time between patients/infusions                                                      |
|                                                       |                                                                                                                                                       | Infusion site hours of operation                                                                |
|                                                       |                                                                                                                                                       | Infusion site staff shift hours/timing                                                          |
|                                                       |                                                                                                                                                       | List mAb therapy quality assurance process                                                      |
|                                                       |                                                                                                                                                       | Pharmacist preparation timing and location                                                      |
|                                                       |                                                                                                                                                       | Average amount of time between pharmacist preparation/cooling conditions to infusion            |
| <b>Staffing</b>                                       | Information on staff, their roles, and requirements to inform staffing models and process improvements.                                               | List the number and types of workers maintaining the infusion site                              |
|                                                       |                                                                                                                                                       | What is the level of training needed for specific infusion site workers?                        |
|                                                       |                                                                                                                                                       | Is there a minimum staffing requirement?                                                        |
|                                                       |                                                                                                                                                       | Is there a maximum number of individuals allowed in the space at once?                          |
|                                                       |                                                                                                                                                       | What is the role of each type of worker?                                                        |
|                                                       |                                                                                                                                                       | Can any worker take on multiple roles?                                                          |
|                                                       |                                                                                                                                                       | How does process timing and steps change if the staff is down one nurse/physician/etc.?         |
|                                                       |                                                                                                                                                       | Which process steps are staff dependent?                                                        |
|                                                       |                                                                                                                                                       | What is the most labor-intensive step for workers?                                              |
| Which process step requires the most skills/training? |                                                                                                                                                       |                                                                                                 |
| <b>Physical Environment</b>                           | Information, layout, and interactions within the facilities/physical                                                                                  | Map infusion site and logistics environment                                                     |
|                                                       |                                                                                                                                                       | Locations/direction of chairs/patients                                                          |
|                                                       |                                                                                                                                                       | Dimensions of infusion site                                                                     |

|                                    |                                                                                                      |                                                                                                                                  |
|------------------------------------|------------------------------------------------------------------------------------------------------|----------------------------------------------------------------------------------------------------------------------------------|
|                                    | environment in the infusion site to inform process improvements and prototype set-ups.               | Infection control/distancing in physical environment                                                                             |
|                                    |                                                                                                      | Can the size or shape of the space be altered?                                                                                   |
|                                    |                                                                                                      | Is any daily setup or deconstruction required?                                                                                   |
| <b>Resources</b>                   | All resources needed that are not staff to inform process model, scale-up, and process improvements. | List all physical resources needed for the infusion process                                                                      |
|                                    |                                                                                                      | PPE resources needed                                                                                                             |
|                                    |                                                                                                      | Infusion site/tent resources                                                                                                     |
|                                    |                                                                                                      | Information systems resources                                                                                                    |
|                                    |                                                                                                      | Could the patient be observed in another setting, i.e., car?<br>What parts of the process do not have to occur in the tent/site? |
| <b>Monitoring &amp; Resilience</b> | Flexibility and resilience of system to process disturbances, emergencies, and capacity changes.     | What happens if an emergency/adverse event occurs?                                                                               |
|                                    |                                                                                                      | How common are emergency/adverse events and how do they impact staffing/flow/etc.?                                               |
|                                    |                                                                                                      | What happens if a patient does not show up for their appointment?                                                                |
|                                    |                                                                                                      | How common are "no shows" and how do they impact staffing/flow/etc.?                                                             |
|                                    |                                                                                                      | Describe the system that is currently being used for patient scheduling                                                          |
|                                    |                                                                                                      | Describe the system currently used to monitor and evaluate (M&E) the infusion process                                            |
|                                    |                                                                                                      | Describe the system that is currently being used to                                                                              |
|                                    |                                                                                                      | Describe the system that is currently being used to monitor logistics and resource allocation                                    |

40  
41  
42  
43  
44  
45  
46  
47  
48  
49  
50

51

52

53

54

55

56

57

58

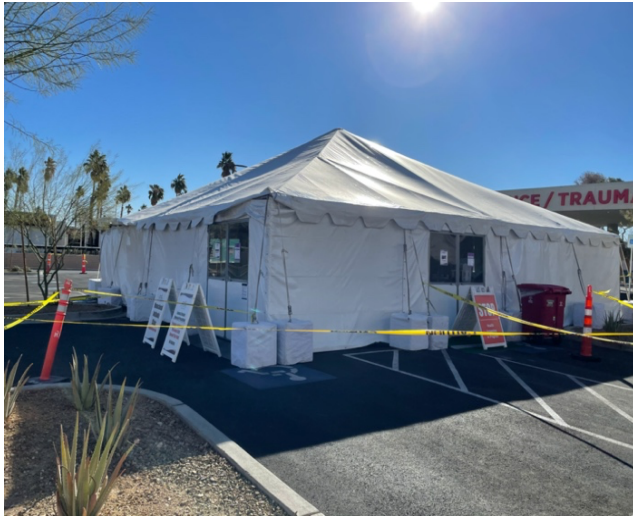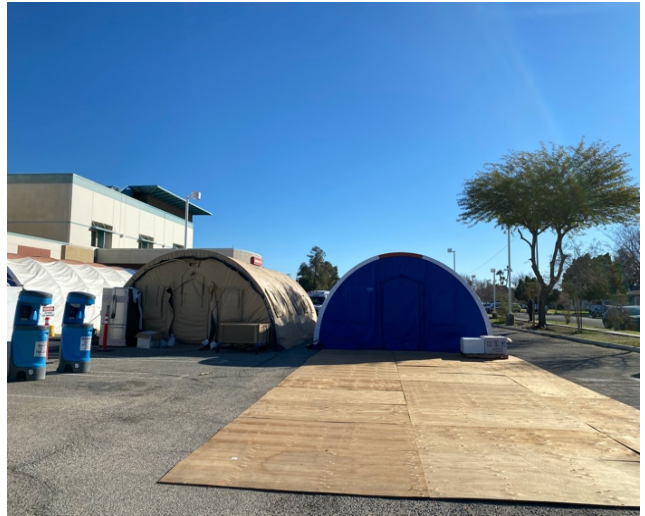

59 **SI Figure 1.** External physical environments of the temporary tent monoclonal antibody infusion sites.

60

61

62

63

64

65

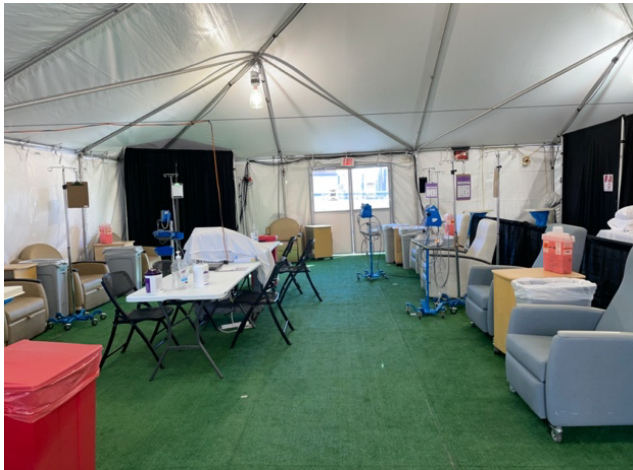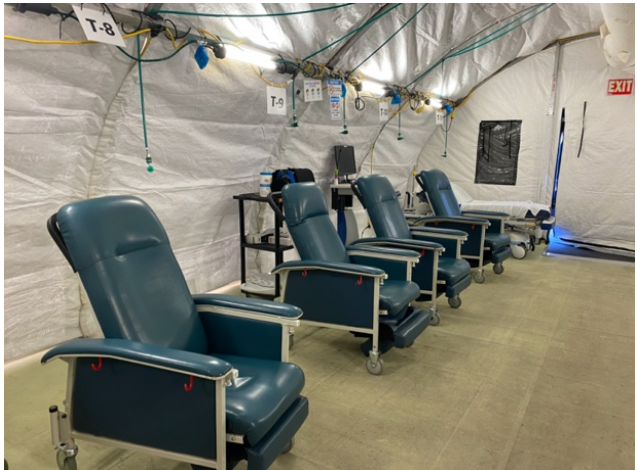

66

67

68

69

70

71

72

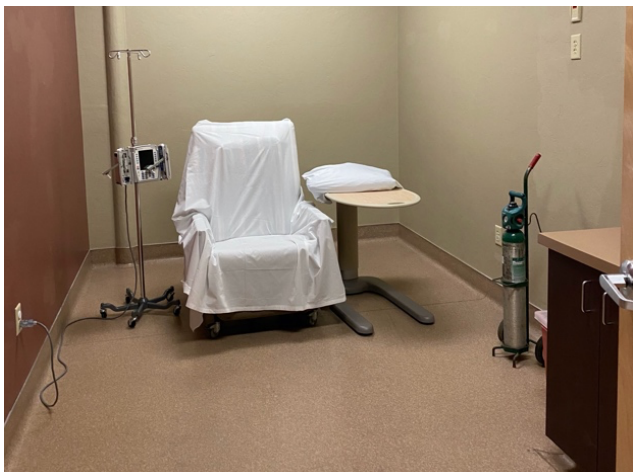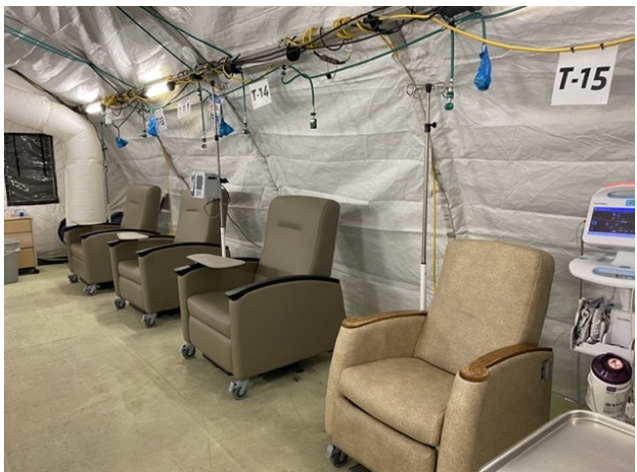

73 **SI Figure 2.** Examples of the internal physical environments of the three monoclonal antibody infusion sites

74 exhibiting both open-concept and individual patient room layouts for the infusion process
