# Supplementary material for: Implementation of SARS-CoV-2 monoclonal antibody infusion sites at three medical centers in the United States: Strengths and challenges assessment to inform COVID-19 pandemic and future public health emergency use
Source: bioRxiv or medRxiv preprint supplement (doi:10.1101/2021.04.05.21254707), 2021-04-06
Supplement: Supplementary file [file media-2.pdf]

## Revised Standards for Quality Improvement Reporting Excellence (SQUIRE 2.0) Author Checklist

**Title:** Implementation of SARS-CoV-2 monoclonal antibody infusion sites at three medical centers in the United States: Strengths and challenges assessment to inform COVID-19 pandemic and future public health emergency use

| Text Section and Item Name | Corresponding Manuscript Page Number |
|----------------------------|--------------------------------------|
| <b>Title and Abstract</b>  |                                      |
| 1                          | Title<br>1                           |
| 2                          | Abstract<br>2                        |
| <b>Introduction</b>        |                                      |
| 3                          | Problem Description<br>4-5           |
| 4                          | Available Knowledge<br>4-5           |
| 5                          | Rationale<br>5                       |
| 6                          | Specific aims<br>5                   |
| <b>Methods</b>             |                                      |
| 7                          | Context<br>6                         |
| 8                          | Interventions<br>6-7                 |
| 9                          | Study of Interventions<br>6-7        |
| 10                         | Measures<br>7                        |
| 11                         | Analysis<br>8                        |
| 12                         | Ethical Considerations<br>6          |
| <b>Results</b>             |                                      |
| 13                         | Results<br>8-19                      |
| <b>Discussion</b>          |                                      |
| 14                         | Summary<br>20                        |
| 15                         | Interpretation<br>20-21              |
| 16                         | Limitations<br>21                    |
| 17                         | Conclusions<br>22-24                 |
| <b>Other Information</b>   |                                      |
| 18                         | Funding<br>25                        |
